# Supplementary material for: Solvent-free and rapid synthesis of mesoporous Pt–iron oxide catalysts via mechanochemical assembly
Source: Royal Society of Chemistry journal article supplement (doi:10.1039/c9cy00970a), 2019-01-01
Supplement: c9cy00970a1.pdf [file c9cy00970a1.pdf]

Supporting Figures:

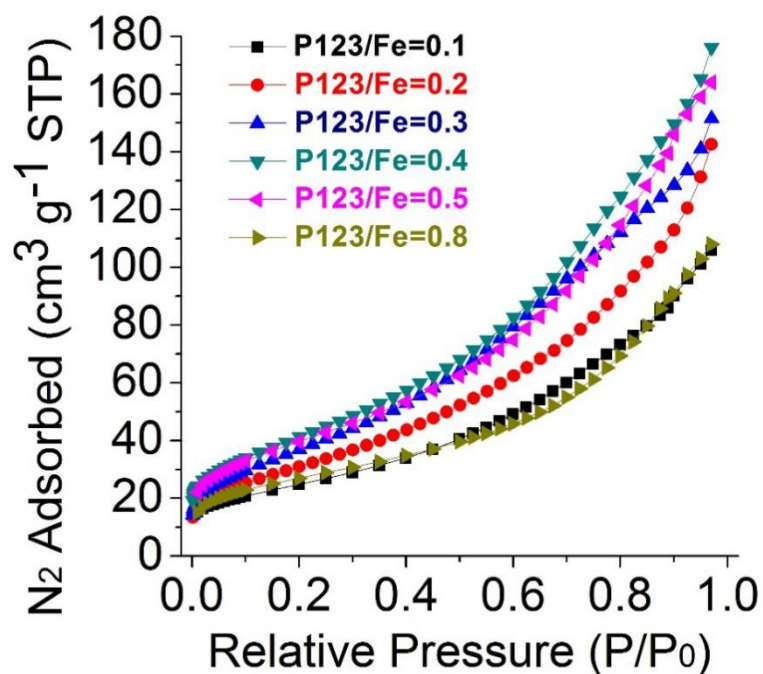

**Figure S1.** N<sub>2</sub> adsorption isotherms of Fe<sub>3</sub>O<sub>4</sub>@P123 samples from different weight ratios of P123/iron nitrate. For example, P123/Fe=0.2 means 0.2 g P123 and 1 g Fe(NO<sub>3</sub>)<sub>3</sub>•9H<sub>2</sub>O used as precursors

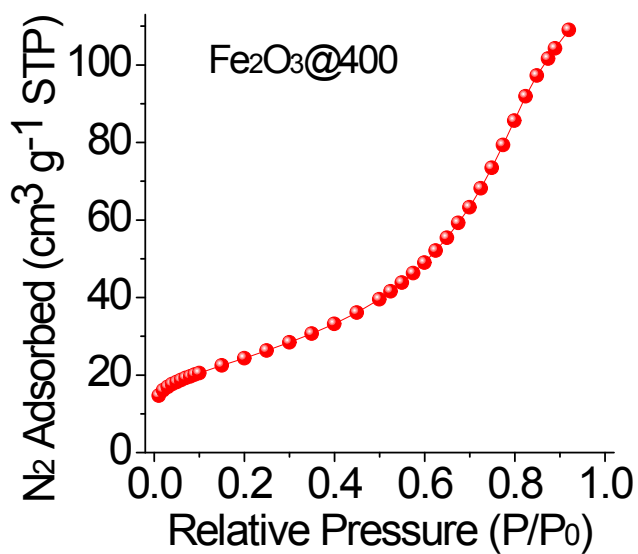

**Figure S2.** N<sub>2</sub> adsorption isotherms of Fe<sub>2</sub>O<sub>3</sub>@P123 sample at 77 K.

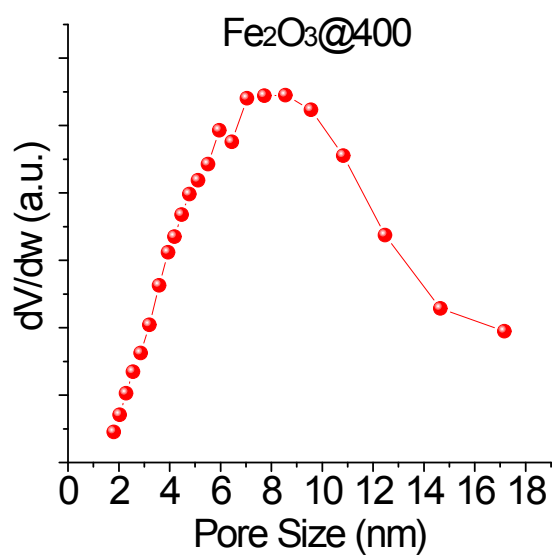

**Figure S3.** Pore size distribution of Fe<sub>2</sub>O<sub>3</sub>@P123

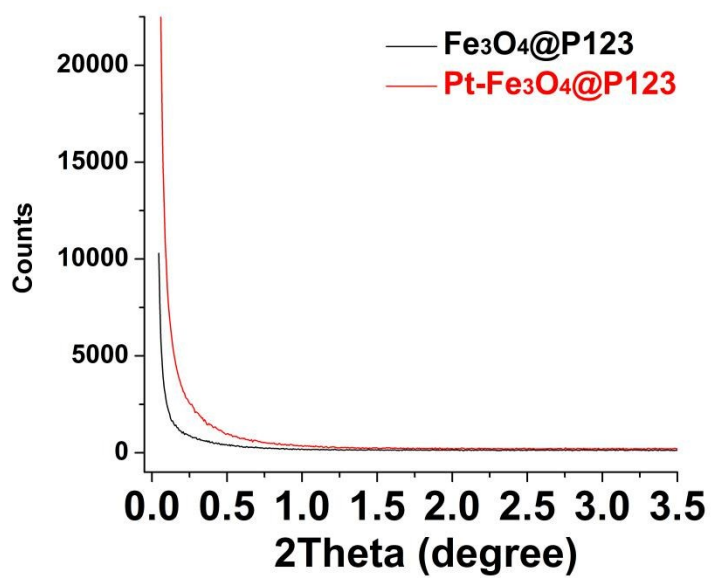

**Figure S4.** Small-angle X-ray scattering results of Fe<sub>3</sub>O<sub>4</sub>@P123 and Pt-Fe<sub>3</sub>O<sub>4</sub>@P123
